# Supplementary material
Source: PubMed Central journal article supplement (PMC6200641)
Supplement: NIHMS1506154-supplement-1.pdf [file NIHMS1506154-supplement-1.pdf]

1 Supplemental Figures

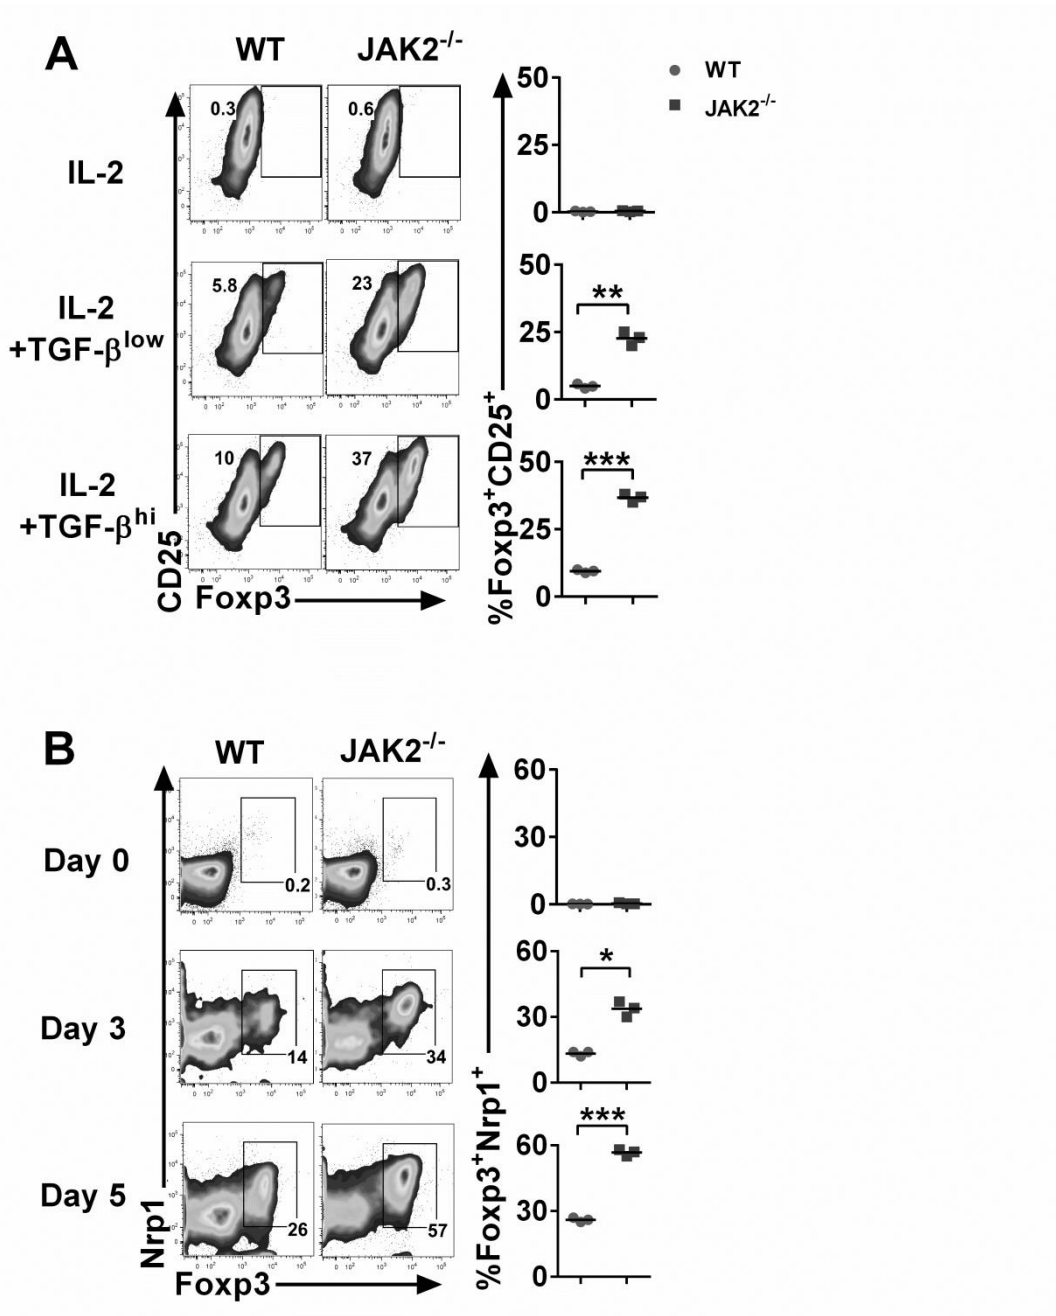

2

3

4 **Figure S1. Generation and phenotype of CD8<sup>+</sup> iTregs.**

5 Allogeneic CD8<sup>+</sup> iTregs were generated *in vitro* as described in figure 1. At day 5, expression of  
6 Foxp3<sup>+</sup> was analyzed by flow cytometry. (A) FACS plots and graphs show %Foxp3<sup>+</sup> expression  
7 among WT and JAK2<sup>-/-</sup> CD8<sup>+</sup> cells (n=3/group). (B) %Foxp3<sup>+</sup> Nrp1<sup>+</sup> on day 0, 3 and 5 of iTreg  
8 generation from WT and JAK2<sup>-/-</sup> CD8<sup>+</sup> cells (n=3/group). Student's *t*-test was used to compare  
9 the data. \*p ≤ 0.05, \*\*p ≤ 0.01 and \*\*\*p ≤ 0.001. Data represent the mean ± SEM.

10

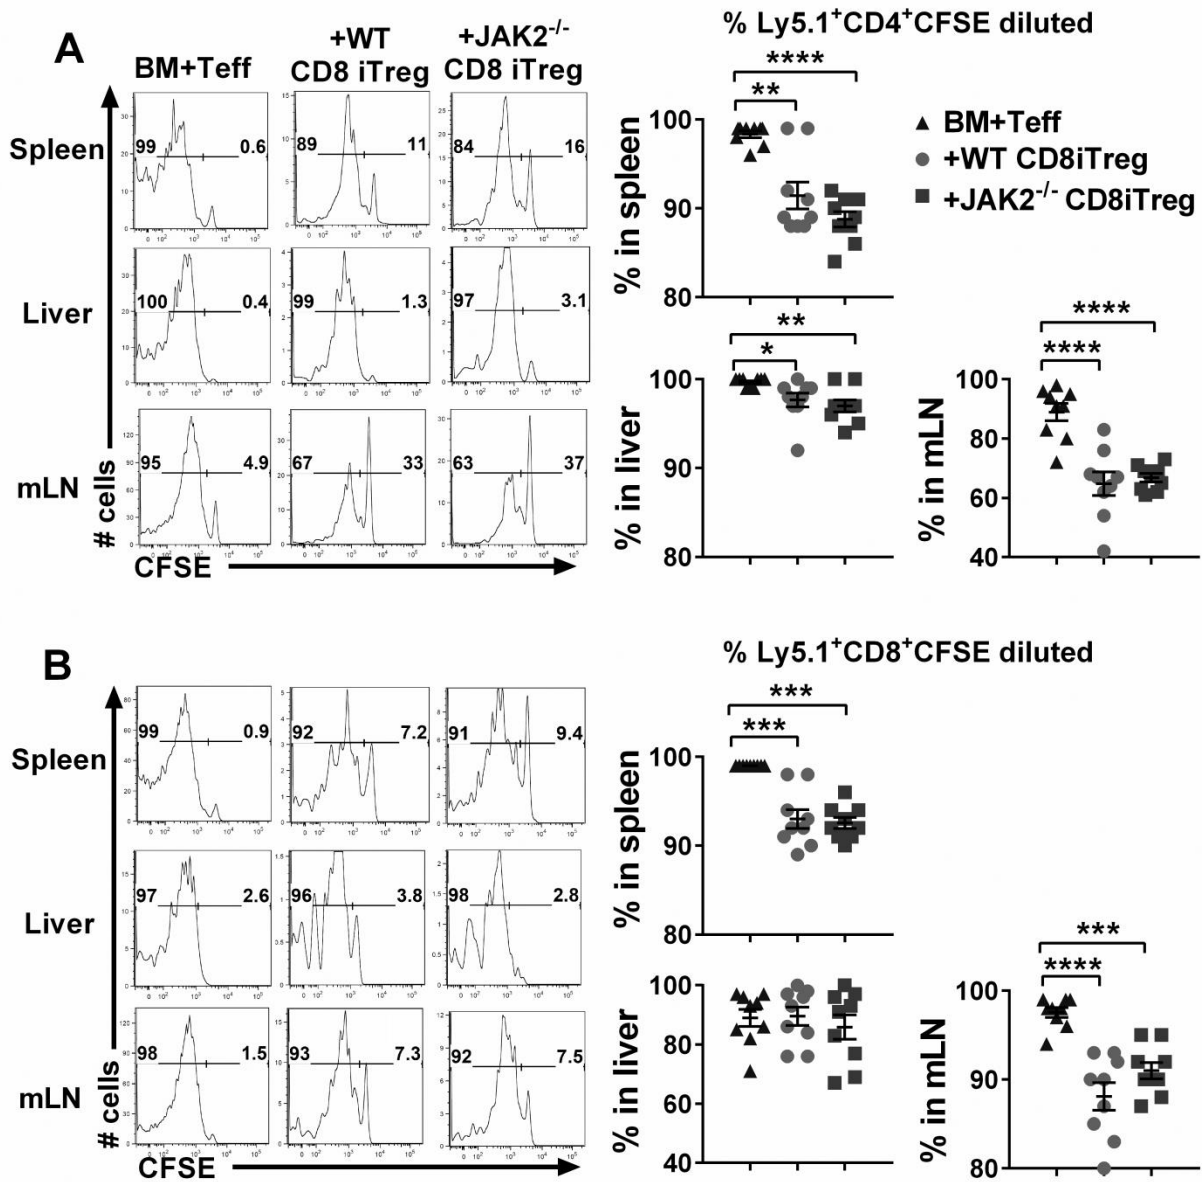

12

13

#### 14 **Figure S2. Suppressive activity of CD8 iTregs *in vivo*.**

15 Lethally irradiated BALB/c mice were adoptively transferred as shown in figure 4A. Seven days  
 16 after BMT, CFSE profile was shown among H2<sup>b</sup>Ly5.1<sup>+</sup>Teff cells. Representative %CFSE-  
 17 diluted cells on gated (A) CD4<sup>+</sup> and (B) CD8<sup>+</sup> Teffs are shown. Data are replicate of 2  
 18 independent experiments (n=9/group). A One- way ANOVA was used to compare the data. \*p ≤  
 19 0.05, \*\*p ≤ 0.01, \*\*\*p ≤ 0.001 and, \*\*\*\*p ≤ 0.0001. Data represent the mean ± SEM.

20

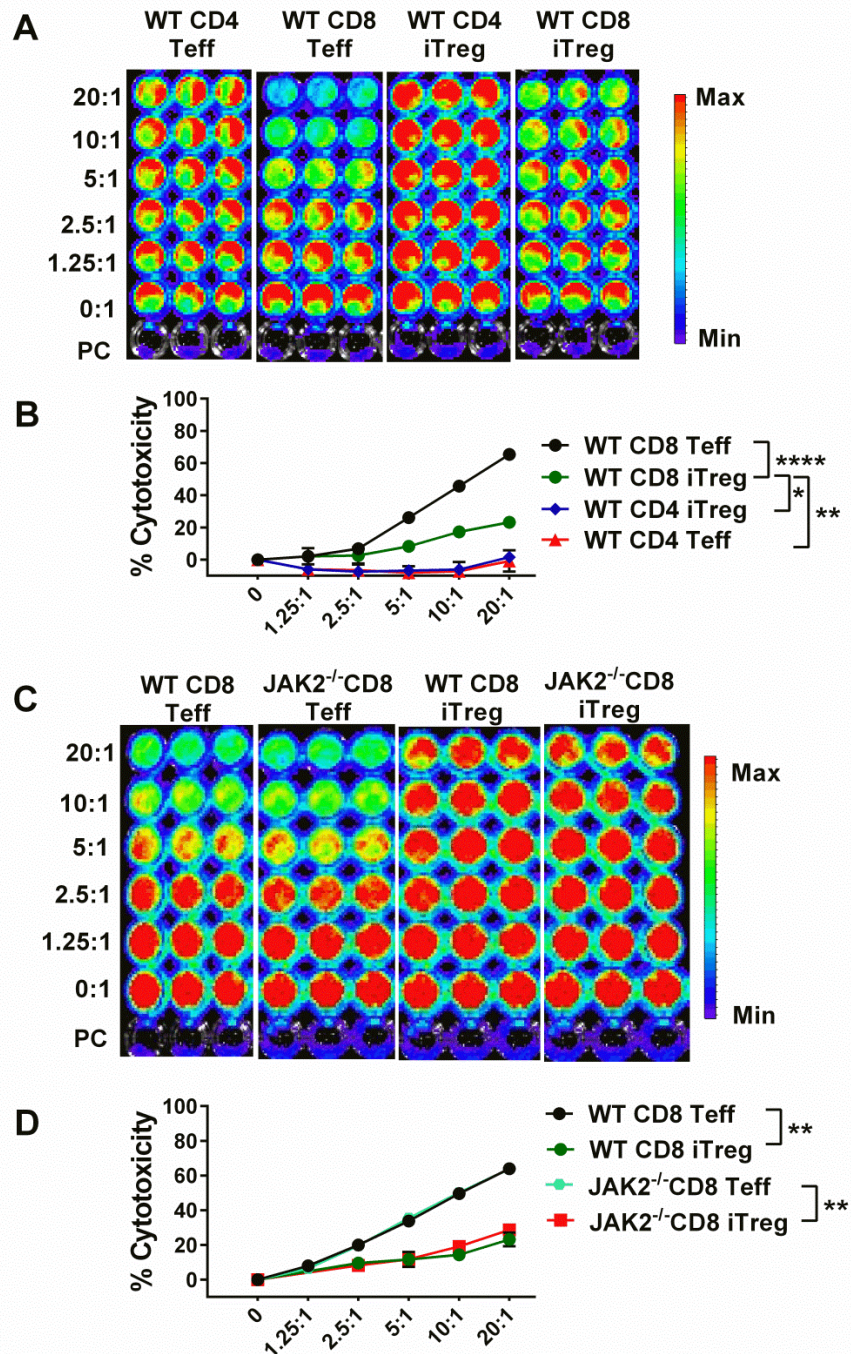

21  
 22  
 23  
 24  
 25  
 26  
 27  
 28  
 29  
 30

**Figure S3. Cytotoxic activity of CD8<sup>+</sup> iTregs *in vitro*.**

Various subsets of T cells as effectors (E) were co-cultured with luciferase-expressing allogeneic P815 mastocytoma targets (T) at 37°C for 4 hrs. After incubation, luciferin was added to the culture. Bioluminescent imaging data were analyzed and quantified using Living Imager Software. **(A and C)** Luminescence images of 96-well plates showing viable tumor cell in Red. **(B and D)** Graph depicting %cytotoxic activity in different E: T ratio is shown. Student's *t*-test was used to compare % cytotoxicity. \**p* ≤ 0.05, \*\**p* ≤ 0.01 and \*\*\**p* ≤ 0.001. Data represent the mean ± SEM.

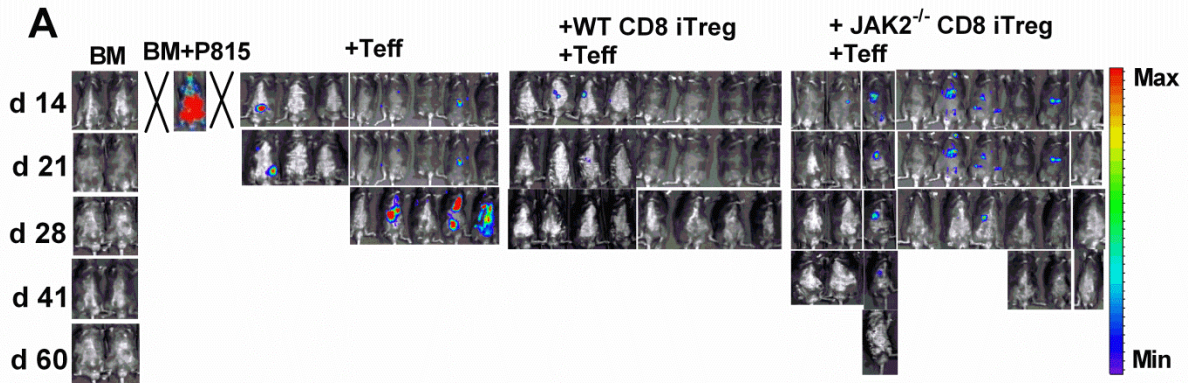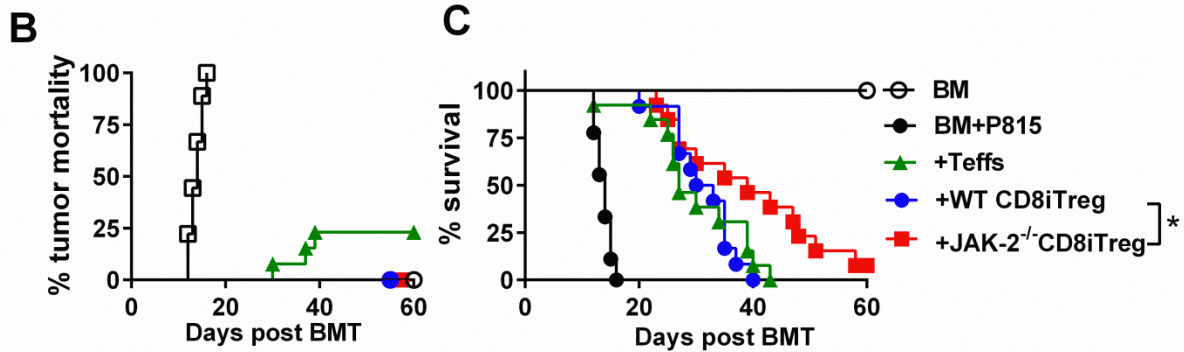

31  
 32 **Figure S4. Effects of CD8 iTregs on GVHD and GVL responses after allo-BMT.**  
 33 Lethally irradiated BDF1 mice were adoptively transferred with  $2 \times 10^6$  CD8<sup>+</sup> iTregs,  $5 \times 10^6$  WT-  
 34 TCD BM, and  $5 \times 10^3$  P815 mastocytoma. Three days later,  $3 \times 10^6$  CD25-depleted T-cells were i.v  
 35 injected to induce GVHD. Recipients were monitored for (A) tumor burden, (B) tumor mortality  
 36 and (C) survival until day 60. Data are combined from 2 independent experiments (n=8-  
 37 9/group). \* $p \leq 0.05$ . Data represent the mean  $\pm$  SEM. Log-rank (Mantel-Cox) test was used to  
 38 compare the tumor mortality and survival.
